# Supplementary material for: Free-standing three-dimensional hollow bacterial cellulose structures with controlled geometryviapatterned superhydrophobic–hydrophilic surfaces
Source: Royal Society of Chemistry journal article supplement (doi:10.1039/c8sm00112j), 2018-01-01

## Supplementary images

### **Free-standing three-dimensional hollow bacterial cellulose structures with controlled geometry via patterned superhydrophobic-hydrophilic surfaces**

Anna Laromaine<sup>a\*</sup>, Tina Tronser<sup>b</sup>, Ivana Pini<sup>b</sup>, Sebastià Parets<sup>a</sup>, Pavel A. Levkin<sup>b,c</sup>, Anna Roig<sup>a</sup>

- a. Institut de Ciència de Materials de Barcelona, Consejo Superior de Investigaciones Científicas (ICMAB-CSIC), Campus de la UAB, 08193 Bellaterra, Catalunya, Spain.
- b. Institute of Toxicology and Genetics, Karlsruhe Institute of Technology (KIT), Hermann-von-Helmholtz Pl. 1, 76344 Eggenstein-Leopoldshafen
- c. Institute of Organic Chemistry, Karlsruhe Institute of Technology (KIT), Fritz-Haber-Weg 6, 76131 Karlsruhe

**Figure S1.** A) Sphere with iodapamidol contrast agent. B) after 41min the iopamidol has been released in the solution and the sphere structure can not be detected. c) Video of the representation of the hollow spherical structure by micro-ct tomography.

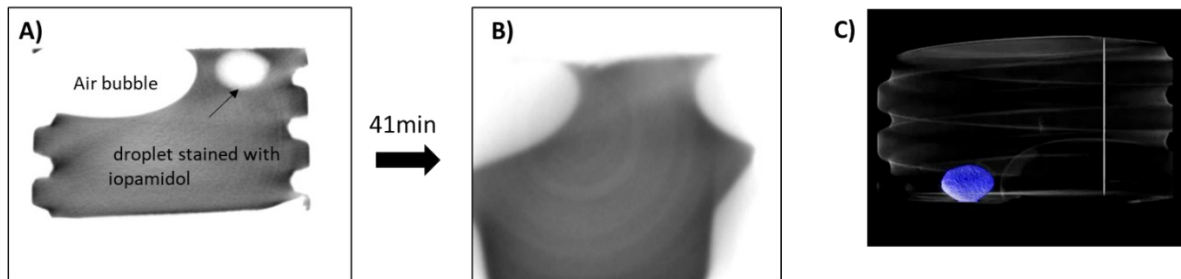

**Figure S2.** The diameter and height computed for BC spheres of 2, 5 and 10  $\mu\text{L}$  volume and cultured for 3 and 6 days by optical images. Lines indicate the ideal diameter if we would have a full sphere.

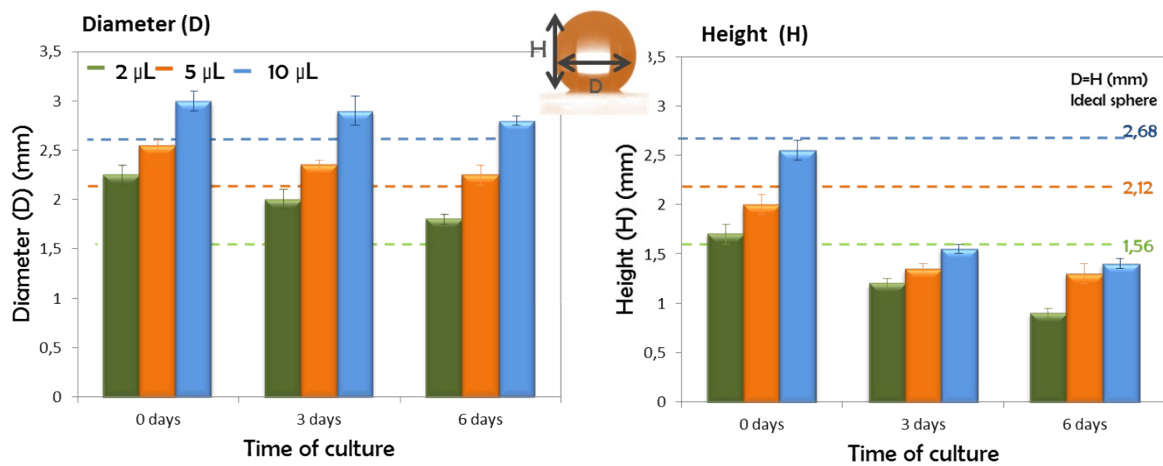

**Figure S3.** Confocal images of two 3D BC spheres cultures at different days, where we can detect the increase of the BC wall thickness.

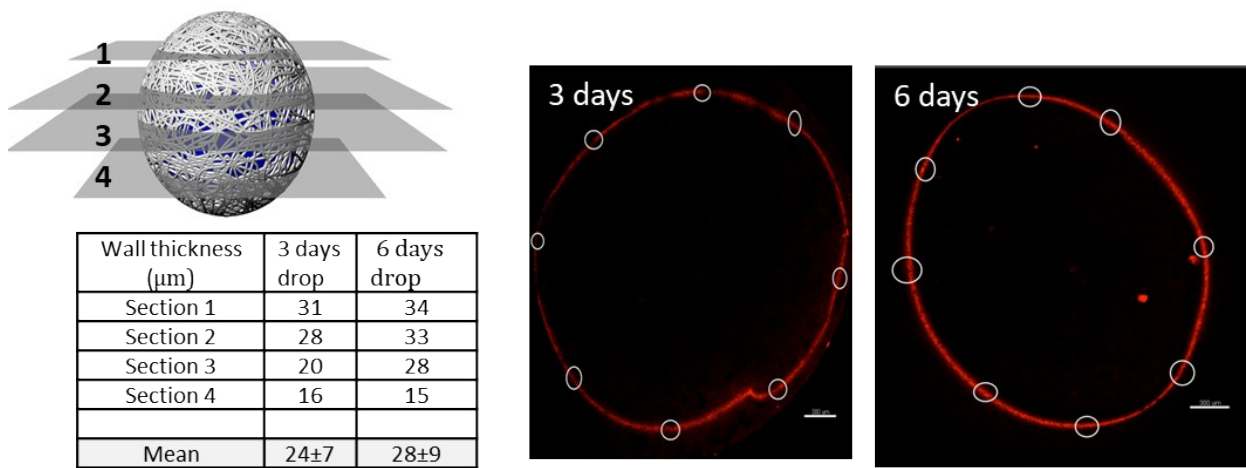

**Figure S4.** SEM image of the porous network formed on the cellulose wall of the

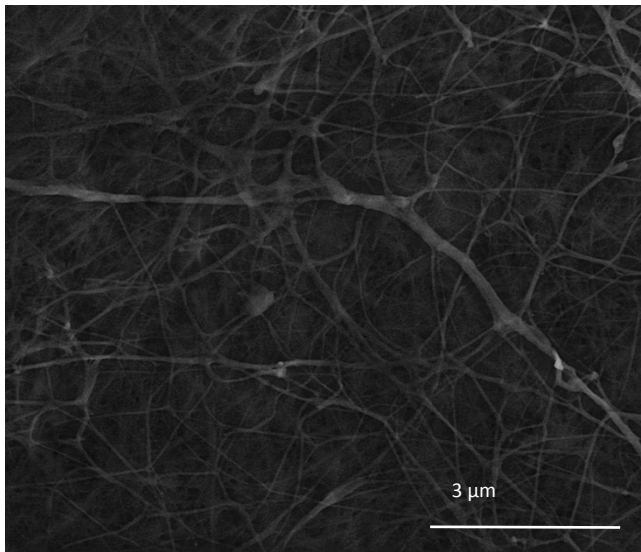

spheres.

**Figure S5.** Culture of mESC outside of BC spheres showing attachment of mESC to sphere surface. B) 3D reconstruction of confocal images (Overlay) showing mESC growing outside the structure after two days of culture. Scale bar 100  $\mu\text{m}$ . Red color: Safranin O, BC sphere; Green color: GFP, mESC Oct4-eGFP.

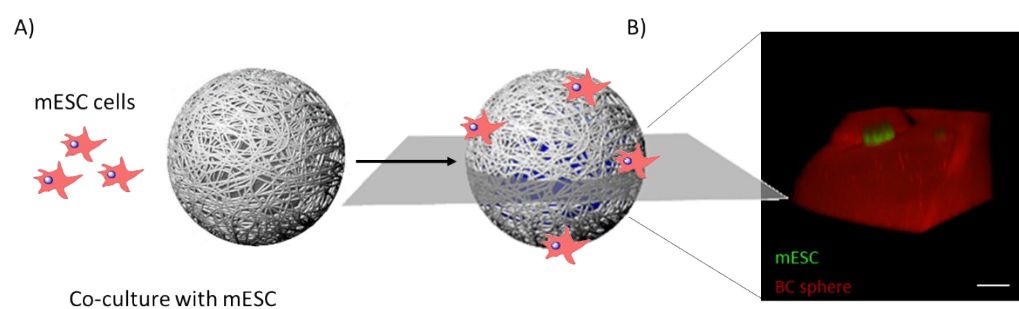

Supplement: c8sm00112j1.pdf [file c8sm00112j1.pdf]
